# Supplementary material
Source: Springer Nature journal article supplement (https://www.springermedizin.de/resource/supplementary/12958_2013_1147_MOESM5_ESM.pdf/9566888)

**A**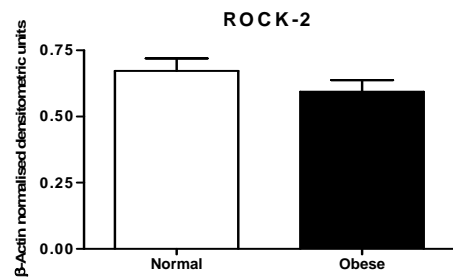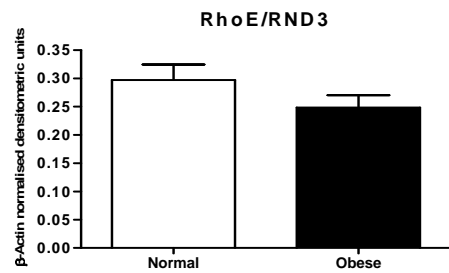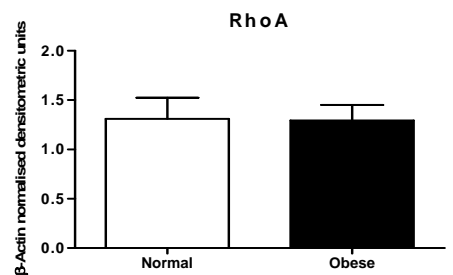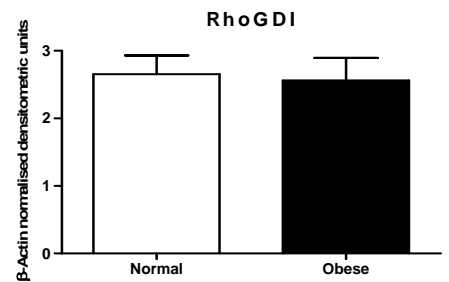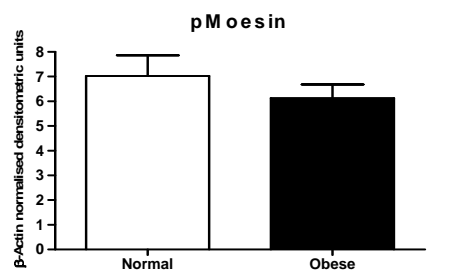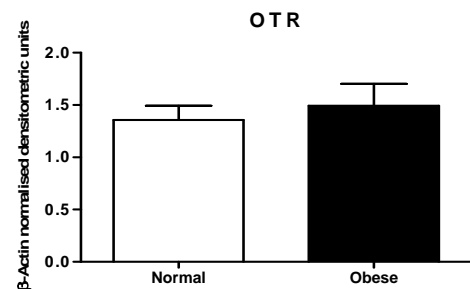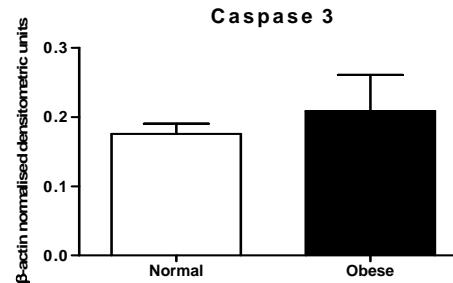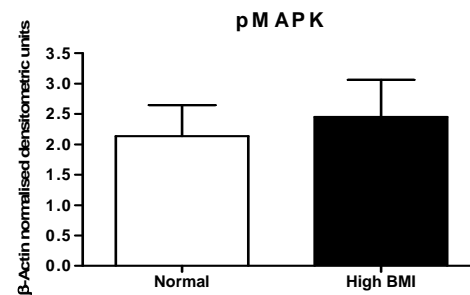**B**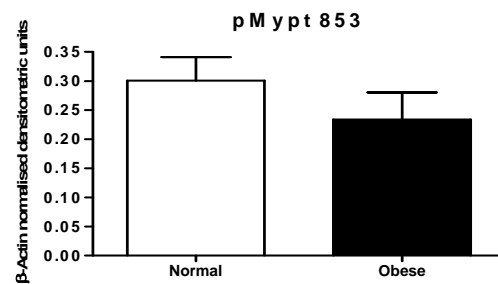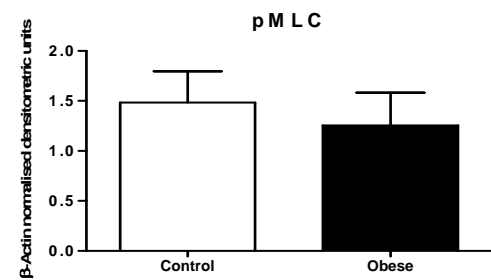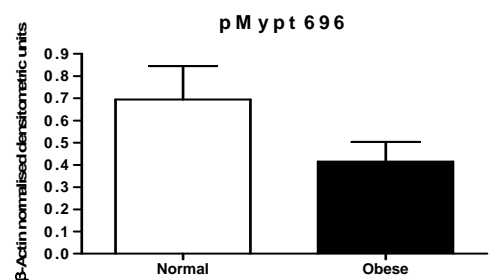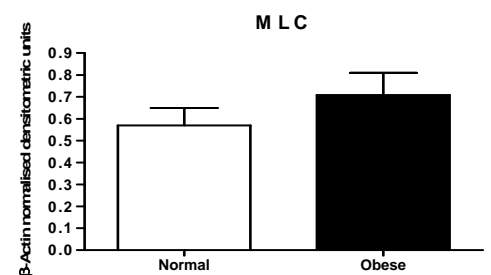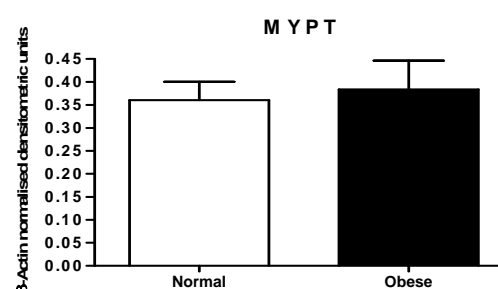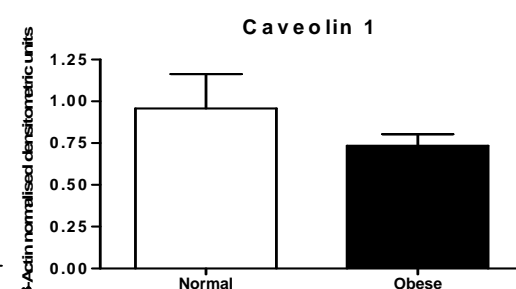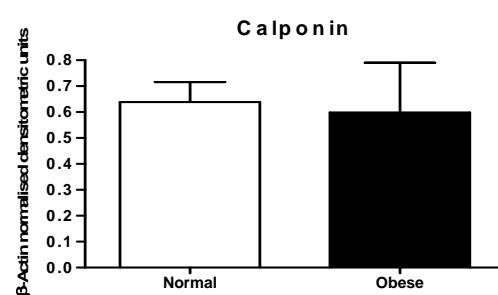

Supplement: MOESM5 [file 9566888]
